# Supplementary material for: Microwave-assisted NixFe1−x nanoclusters ultra-stable to oxidation in aqueous media
Source: Royal Society of Chemistry journal article supplement (doi:10.1039/d2nr03629k), 2022-01-01
Supplement: d2nr03629k1.pdf [file d2nr03629k1.pdf]

## Supporting information

# Microwave-assisted ultra-stable to oxidation $\text{Fe}_x\text{Ni}_{1-x}$ nanoclusters in aqueous media

**Antonio Santana-Otero<sup>1,2</sup>, María Eugenia Fortes Brollo<sup>3</sup>, María del Puerto Morales<sup>4</sup>, Daniel Ortega<sup>1,2,5\*</sup>**

<sup>1</sup> Condensed Matter Physics department, Faculty of Sciences, Campus Universitario de Puerto Real, 11510 Puerto Real (Cádiz) Spain

<sup>2</sup> Institute of Research and Innovation in Biomedical Sciences of Cádiz (INiBICA), University of Cádiz, 11009 Cádiz, Spain

<sup>3</sup> Department of Physics, Chalmers University, Fysikgränd 3, 412 96 Gothenburg, Sweden

<sup>4</sup> Institute of Materials Science of Madrid (ICMM-CSIC), Sor Juana Inés de la Cruz 3, 28049 Madrid, Spain

<sup>5</sup> IMDEA Nanoscience, Faraday 9, 28049 Madrid, Spain

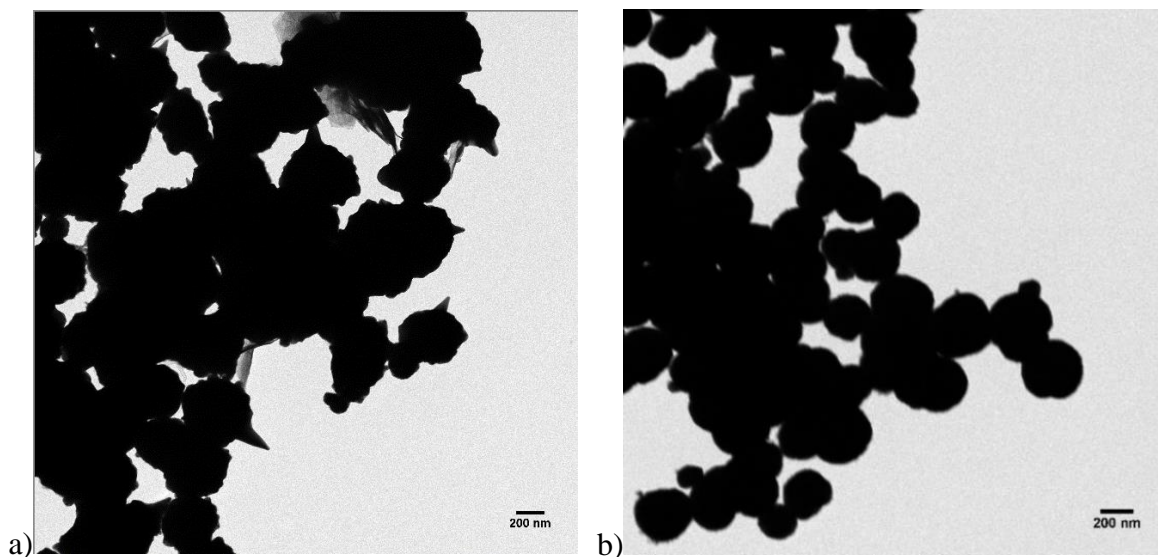

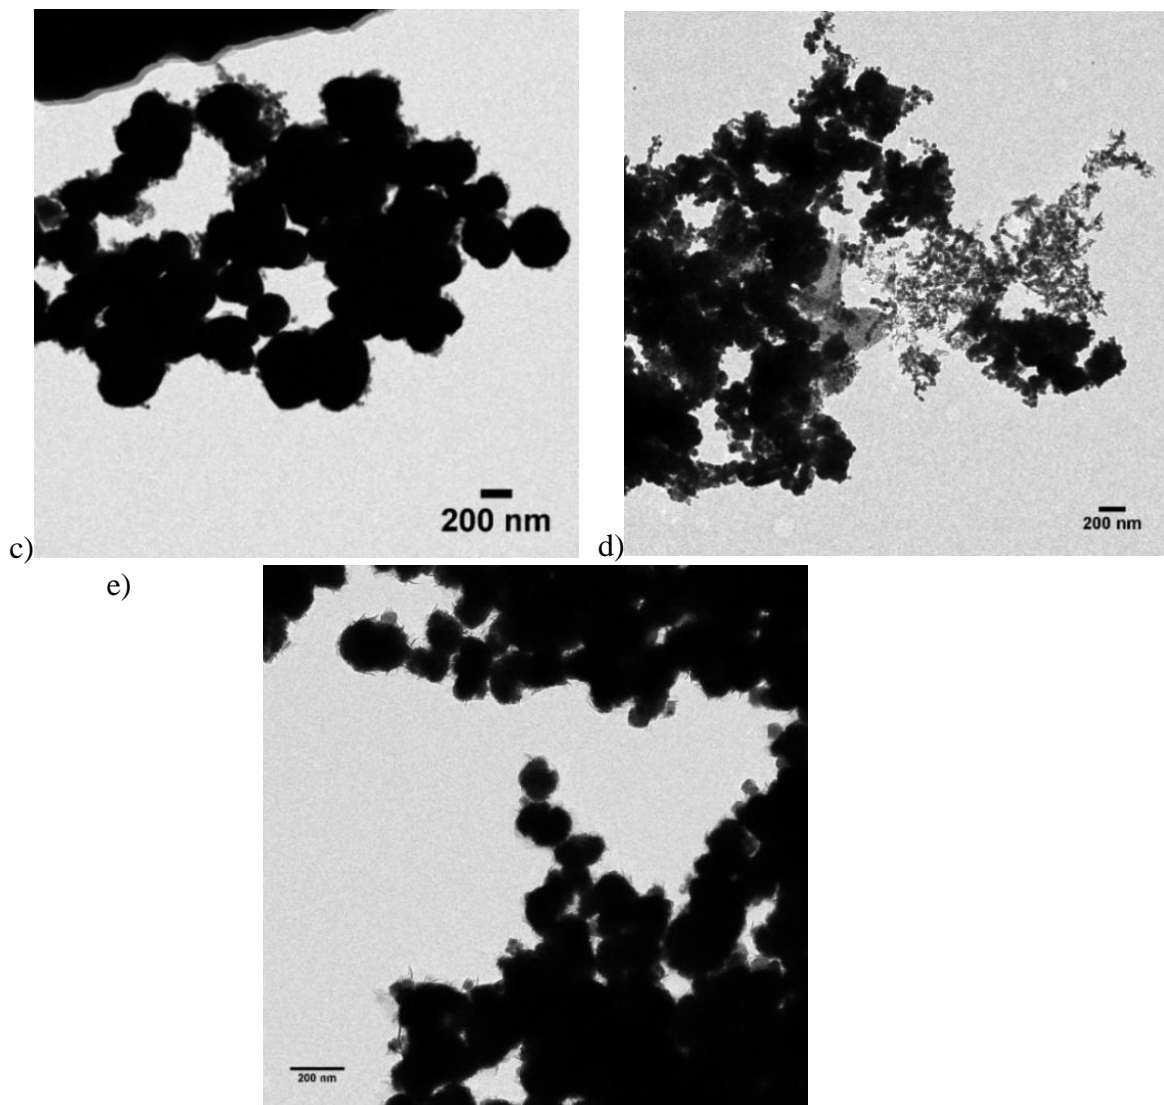

**Figure S1** TEM images from FNNPS with (a) 0%, (b) 15%, (c) 25%, (d) 35%, and (e) 100% of Fe.

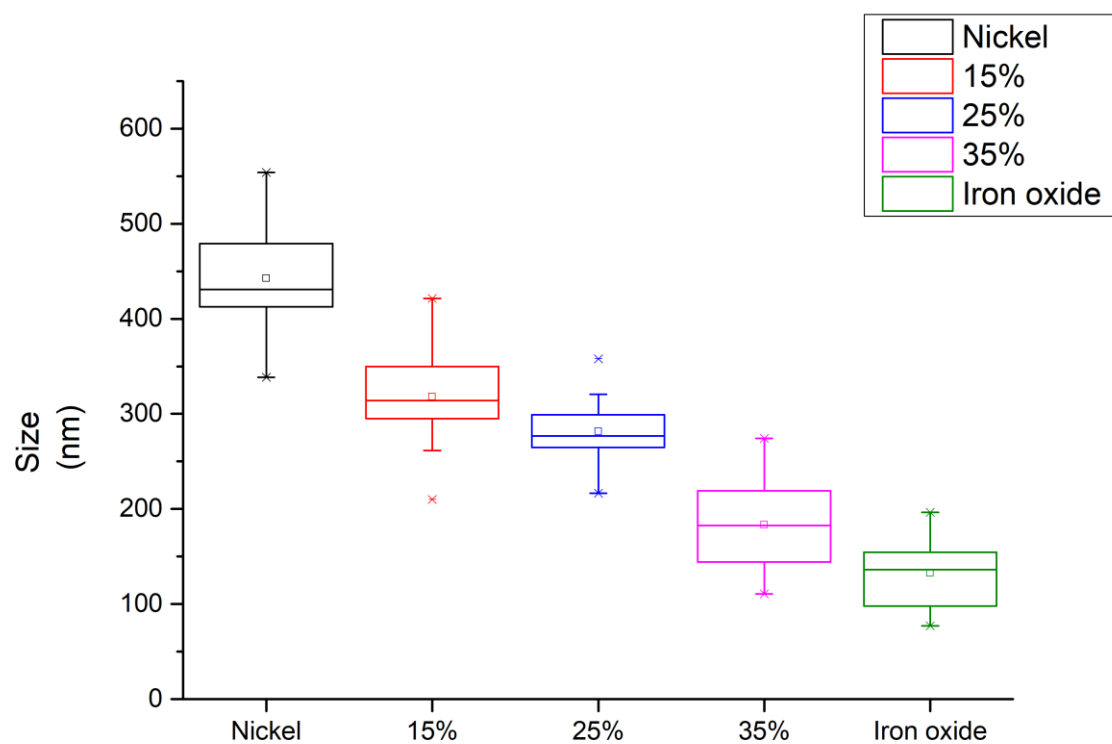

**Figure S2** Size distribution of aggregates of FNNPS from TEM images.

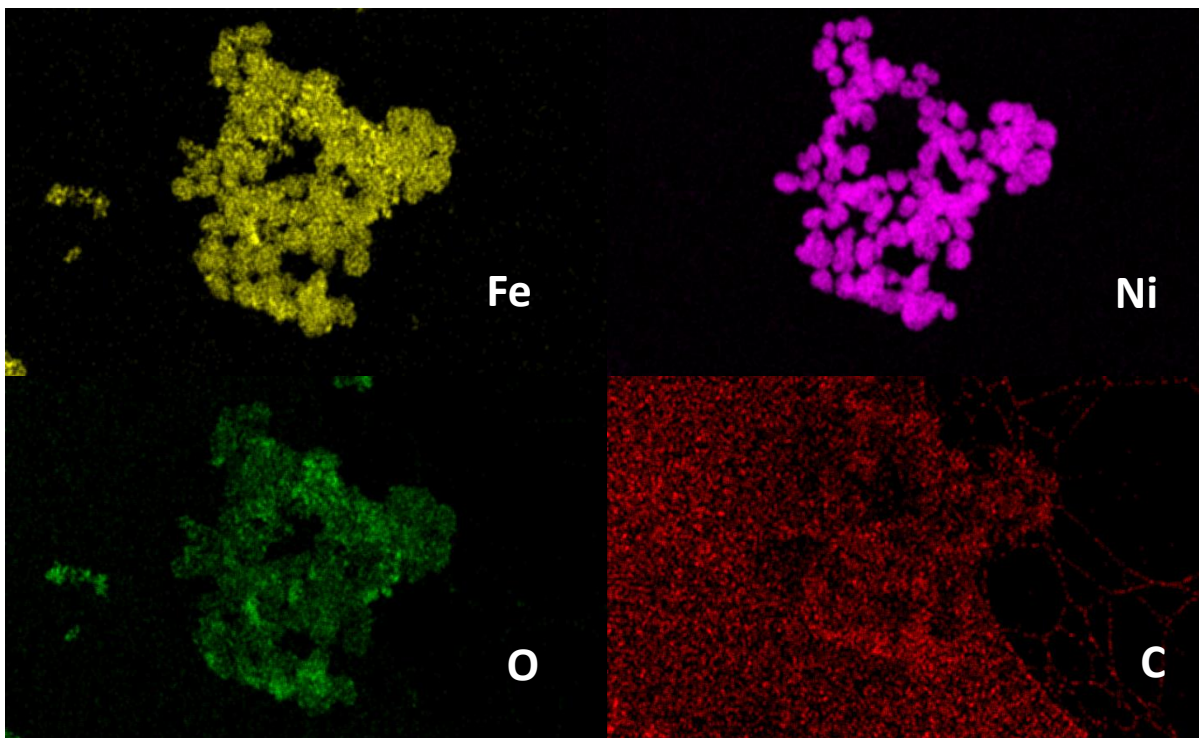

**Figure S3** Individual Fe, Ni, C and O EDX chemical maps for sample  $\text{Fe}_{25}\text{Ni}_{75}$ .

**Table S1** Parameters from the Rietveld analysis of Fe-Ni phases present in the studied sample set.

| FeNi 0%  |                     |                          |                          |            |            |   |   |   |              |          |          |                         |               |               |               |              |                      |                  |                   |               |                                 |
|----------|---------------------|--------------------------|--------------------------|------------|------------|---|---|---|--------------|----------|----------|-------------------------|---------------|---------------|---------------|--------------|----------------------|------------------|-------------------|---------------|---------------------------------|
| No.      | Pos. [°2 $\theta$ ] | FWHM Left [°2 $\theta$ ] | Struct. B [°2 $\theta$ ] | Area calc. | Assignment | h | k | l | Multiplicity | F obs.   | F calc.  | Area [cts**2 $\theta$ ] | Derivation    | Backgr. [cts] | d-spacing [Å] | Height [cts] | Crystallite Size [Å] | Micro Strain [%] | K-A2 / K-A1 Ratio | Rel. Int. [%] | Integral Breadth [°2 $\theta$ ] |
| 1        | 44,45036            | 0,287227                 | 0,2917                   | 6649,555   | global     | 1 | 1 | 1 | 8            | 68,19948 | 68,16285 | 6656,704                | Pure K-Alpha1 | 1152,62       | 2,03649       | 18818,51     | 307,2775852          | 0,2478           | 0,5               | 100           | 0,353732                        |
| 2        | 51,80224            | 0,382203                 | 0,3932                   | 2970,211   | global     | 0 | 0 | 2 | 6            | 61,17652 | 62,57125 | 2839,273                | Pure K-Alpha1 | 1135,25       | 1,76343       | 6277,566     | 234,5855301          | 0,3047           | 0,5               | 33,36         | 0,452289                        |
| 3        | 76,32858            | 0,53272                  | 0,5816                   | 1443,931   | global     | 0 | 2 | 2 | 12           | 46,50267 | 46,66282 | 1434,037                | Pure K-Alpha1 | 1084,28       | 1,2466        | 2218,572     | 181,4508458          | 0,252            | 0,5               | 11,79         | 0,646378                        |
| 4        | 92,87974            | 0,509126                 | 0,5127                   | 1573,037   | global     | 1 | 1 | 3 | 24           | 37,4837  | 38,79097 | 1468,799                | Pure K-Alpha1 | 1055,97       | 1,06299       | 2625,606     | 234,846711           | 0,2127           | 0,5               | 13,95         | 0,559413                        |
| 5        | 98,38263            | 0,459016                 | 0,4772                   | 461,2541   | global     | 2 | 2 | 2 | 8            | 35,3103  | 36,66243 | 427,8589                | Pure K-Alpha1 | 1047,64       | 1,01771       | 868,708      | 266,0543111          | 0,1798           | 0,5               | 4,62          | 0,492523                        |
| FeNi 5%  |                     |                          |                          |            |            |   |   |   |              |          |          |                         |               |               |               |              |                      |                  |                   |               |                                 |
| 1        | 44,26837            | 0,361525                 | 0,4396                   | 5808,327   | global     | 1 | 1 | 1 | 8            | 83,41291 | 84,76206 | 5624,897                | Pure K-Alpha1 | 2530,55       | 2,04444       | 11175,26     | 203,76446            | 0,2217           | 0,5               | 100           | 0,503335                        |
| 2        | 51,61706            | 0,498599                 | 0,631                    | 2238,045   | global     | 0 | 0 | 2 | 6            | 71,95543 | 72,26607 | 2218,845                | Pure K-Alpha1 | 2503,03       | 1,76932       | 3214,092     | 146,0646989          | 0,2686           | 0,5               | 28,76         | 0,690349                        |
| 3        | 76,13093            | 0,772071                 | 0,8851                   | 962,3884   | global     | 0 | 2 | 2 | 12           | 50,87789 | 50,68994 | 969,5382                | Pure K-Alpha1 | 2391,22       | 1,24935       | 1022,375     | 119,0702827          | 0,3599           | 0,5               | 9,15          | 0,94832                         |
| 4        | 92,67106            | 0,868612                 | 0,918                    | 955,4138   | global     | 1 | 1 | 3 | 24           | 39,78119 | 40,23599 | 933,9374                | Pure K-Alpha1 | 2298,37       | 1,06484       | 1013,746     | 130,9106456          | 0,3823           | 0,5               | 9,07          | 0,921273                        |
| 5        | 98,16953            | 0,882453                 | 0,905                    | 290,123    | global     | 2 | 2 | 2 | 8            | 38,50003 | 38,70378 | 287,0764                | Pure K-Alpha1 | 2264,39       | 1,01935       | 315,9247     | 139,9872698          | 0,3422           | 0,5               | 2,83          | 0,908686                        |
| FeNi 10% |                     |                          |                          |            |            |   |   |   |              |          |          |                         |               |               |               |              |                      |                  |                   |               |                                 |
| 1        | 44,19223            | 0,446111                 | 0,5636                   | 2111,82    | global     | 1 | 1 | 1 | 8            | 51,76937 | 51,74858 | 2113,518                | Pure K-Alpha1 | 1059,93       | 2,04779       | 3383,493     | 158,8904788          | 0,2717           | 0,5               | 100           | 0,624656                        |
| 2        | 51,50977            | 0,597294                 | 0,7825                   | 634,3611   | global     | 0 | 0 | 2 | 6            | 39,05611 | 38,94989 | 637,8257                | Pure K-Alpha1 | 1089,85       | 1,77275       | 759,1015     | 117,7318238          | 0,3038           | 0,5               | 22,44         | 0,840238                        |
| 3        | 75,90233            | 0,9852                   | 1,3193                   | 333,0883   | global     | 0 | 2 | 2 | 12           | 30,16128 | 30,20999 | 332,0149                | Pure K-Alpha1 | 1061,15       | 1,25254       | 241,6497     | 79,75814968          | 0,3248           | 0,5               | 7,14          | 1,373951                        |
| 4        | 92,33542            | 1,229217                 | 1,6634                   | 304,3025   | global     | 1 | 1 | 3 | 24           | 23,08347 | 23,05928 | 304,9413                | Pure K-Alpha1 | 1041,32       | 1,06783       | 176,9411     | 72,02645918          | 0,2972           | 0,5               | 5,23          | 1,723406                        |
| 5        | 97,79104            | 1,314106                 | 1,7775                   | 114,8506   | global     | 2 | 2 | 2 | 8            | 24,77107 | 24,75823 | 114,9697                | Pure K-Alpha1 | 1018,1        | 1,02228       | 162,9675     | 71,00320171          | 0,2901           | 0,5               | 1,85          | 1,840473                        |
| FeNi 15% |                     |                          |                          |            |            |   |   |   |              |          |          |                         |               |               |               |              |                      |                  |                   |               |                                 |
| 1        | 44,1241             | 0,500892                 | 0,6742                   | 4762,546   | global     | 1 | 1 | 1 | 8            | 23,33747 | 23,33407 | 4763,936                | Pure K-Alpha1 | 1101,73       | 2,05079       | 6349,621     | 132,7930581          | 0,1936           | 0,5               | 100           | 0,750271                        |
| 2        | 51,45003            | 0,688987                 | 0,9598                   | 1745,11    | global     | 0 | 0 | 2 | 6            | 19,46468 | 19,39838 | 1757,06                 | Pure K-Alpha1 | 1086,9        | 1,77496       | 1691,471     | 95,95957456          | 0,213            | 0,5               | 26,64         | 1,038777                        |
| 3        | 75,87524            | 1,160248                 | 1,6513                   | 1075,603   | global     | 0 | 2 | 2 | 12           | 16,2584  | 16,2981  | 1070,369                | Pure K-Alpha1 | 1040,21       | 1,25292       | 619,0898     | 63,71073244          | 0,2569           | 0,5               | 9,75          | 1,72894                         |
| 4        | 92,33709            | 1,454044                 | 2,0881                   | 1208,904   | global     | 1 | 1 | 3 | 24           | 13,80895 | 13,78948 | 1212,319                | Pure K-Alpha1 | 1011,14       | 1,06781       | 555,2221     | 57,37782239          | 0,2231           | 0,5               | 8,74          | 2,183485                        |
| 5        | 97,80422            | 1,556102                 | 2,2273                   | 430,5292   | global     | 2 | 2 | 2 | 8            | 14,34839 | 14,37722 | 428,8041                | Pure K-Alpha1 | 1001,92       | 1,02218       | 184,7639     | 56,67167943          | 0,2329           | 0,5               | 2,91          | 2,320822                        |
| FeNi 25% |                     |                          |                          |            |            |   |   |   |              |          |          |                         |               |               |               |              |                      |                  |                   |               |                                 |
| 1        | 44,01104            | 1,046323                 | 1,3384                   | 1457,874   | global     | 1 | 1 | 1 | 8            | 66,24718 | 66,1084  | 1464,001                | Pure K-Alpha1 | 1062,09       | 2,0558        | 1055,792     | 66,86591274          | 0,7921           | 0,5               | 100           | 1,386639                        |
| 2        | 51,32787            | 1,046323                 | 1,3585                   | 378,2289   | global     | 0 | 0 | 2 | 6            | 46,66204 | 46,24244 | 385,1242                | Pure K-Alpha1 | 1052,84       | 1,7786        | 273,9132     | 67,76206854          | 0,6394           | 0,5               | 25,94         | 1,406008                        |
| 3        | 75,71768            | 1,046323                 | 1,2847                   | 271,7039   | global     | 0 | 2 | 2 | 12           | 41,36942 | 41,95181 | 264,2125                | Pure K-Alpha1 | 1052,63       | 1,25513       | 196,7678     | 81,80352557          | 0,4475           | 0,5               | 18,64         | 1,342763                        |
| 4        | 92,14835            | 1,046323                 | 1,2925                   | 227,6511   | global     | 1 | 1 | 3 | 24           | 30,41985 | 30,66784 | 223,9842                | Pure K-Alpha1 | 1050,17       | 1,06951       | 164,8649     | 92,53817453          | 0,3251           | 0,5               | 15,62         | 1,358593                        |
| 5        | 97,603              | 1,046323                 | 1,2871                   | 100,8209   | global     | 2 | 2 | 2 | 8            | 35,37114 | 35,66938 | 99,142                  | Pure K-Alpha1 | 1042,93       | 1,02375       | 73,01448     | 97,87229995          | 0,2957           | 0,5               | 6,92          | 1,357841                        |
| FeNi 33% |                     |                          |                          |            |            |   |   |   |              |          |          |                         |               |               |               |              |                      |                  |                   |               |                                 |
| 1        | 44,11382            | 1,504027                 | 1,2999                   | 1175,407   | global     | 1 | 1 | 1 | 8            | 14,0954  | 14,09696 | 1175,147                | Pure K-Alpha1 | 1113,48       | 2,05125       | 903(218)     | 68,87131711          | 1,3997           | 0,5               | 100           | 1,301273                        |
| 2        | 51,41678            | 1,623471                 | 1,1954                   | 256,6882   | global     | 0 | 0 | 2 | 6            | 9,059109 | 9,046399 | 257,41                  | Pure K-Alpha1 | 1104,75       | 1,77574       | 215(78)      | 77,03624675          | 1,0832           | 0,5               | 23,81         | 1,196922                        |
| 3        | 75,75263            | 2,040321                 | 0,8727                   | 90,5262    | global     | 0 | 2 | 2 | 12           | 5,682905 | 5,752055 | 88,3627                 | Pure K-Alpha1 | 1098,23       | 1,25464       | 101(45)      | 120,4513759          | 0,4895           | 0,5               | 11,18         | 0,875321                        |
| 4        | 92,13585            | 2,367048                 | 0,7775                   | 49,1506    | global     | 1 | 1 | 3 | 24           | 3,423882 | 3,388496 | 50,1825                 | Pure K-Alpha1 | 1065,88       | 1,06962       | 64(20)       | 153,816138           | 0,3268           | 0,5               | 7,11          | 0,781292                        |
| 5        | 97,57156            | 2,490571                 | 0,705                    | 17,112     | global     | 2 | 2 | 2 | 8            | 3,4416   | 3,496175 | 16,582                  | Pure K-Alpha1 | 1022,95       | 1,02399       | 23(5)        | 178,6269108          | 0,2694           | 0,5               | 2,59          | 0,709707                        |
| FeNi 35% |                     |                          |                          |            |            |   |   |   |              |          |          |                         |               |               |               |              |                      |                  |                   |               |                                 |
| 1        | 44,142              | 1,514252                 | 1,9592                   | 1883,258   | global     | 1 | 1 | 1 | 8            | 54,46395 | 54,4303  | 1885,588                | Pure K-Alpha1 | 1102,92       | 2,05          | 942,4011     | 45,69964739          | 1,1543           | 0,5               | 100           | 2,000834                        |
| 2        | 51,43948            | 1,514252                 | 2,0092                   | 270,6721   | global     | 0 | 0 | 2 | 6            | 28,68529 | 28,33603 | 277,3856                | Pure K-Alpha1 | 1089,17       | 1,77501       | 135,447      | 45,83810212          | 0,9066           | 0,5               | 14,37         | 2,047927                        |
| 3        | 75,75399            | 1,514252                 | 1,8877                   | 282,6553   | global     | 0 | 2 | 2 | 12           | 30,56051 | 31,00682 | 274,5768                | Pure K-Alpha1 | 1066,3        | 1,25462       | 141,4435     | 55,68622457          | 0,6501           | 0,5               | 15,01         | 1,941248                        |
| 4        | 92,1185             | 1,514252                 | 1,91                     | 180,6963   | global     | 1 | 1 | 3 | 24           | 19,68677 | 19,82858 | 178,1209                | Pure K-Alpha1 | 1060,48       | 1,06977       | 90,42222     | 62,60379925          | 0,4697           | 0,5               | 9,59          | 1,96988                         |
| 5        | 97,54674            | 1,514252                 | 1,9467                   | 130,0345   | global     | 2 | 2 | 2 | 8            | 29,48929 | 29,41954 | 130,6518                | Pure K-Alpha1 | 1052,75       | 1,02419       | 65,07055     | 64,67398206          | 0,4056           | 0,5               | 6,9           | 2,007848                        |

**Table S2** Lattice parameter (in Å) of each of the phases present in FNNPS samples.

| <b>Name</b>        | <b>Iron-Nickel phase</b> | <b>Iron oxide phase</b> | <b>Nickel phase</b> |
|--------------------|--------------------------|-------------------------|---------------------|
| 0% FNNPS           | N/A                      | N/A                     | 3,52442             |
| 5% FNNPS           | 3,52570                  | N/A                     | N/A                 |
| 15% FNNPS          | 3,53500                  | N/A                     | N/A                 |
| 25% FNNPS          | 3,54049                  | --*                     | N/A                 |
| 33% FNNPS          | 3,54411                  | --*                     | N/A                 |
| 35% FNNPS          | 3,54634                  | --*                     | N/A                 |
| 50% FNNPS          | 3,55056                  | 8,390079                | N/A                 |
| 70% FNNPS          | 3,55681                  | 8,396987                | N/A                 |
| 90% FNNPS          | N/A                      | 8,394861                | N/A                 |
| 100% FNNPS (IONPS) | N/A                      | 8,394224                | N/A                 |

\* *Some iron oxide peaks are not intense enough to be included in the Rietveld refinement.*
